# Supplementary material for: Separation of soil respiration: a site-specific comparison of partition methods
Source: Copernicus journal article supplement (doi:10.5194/soil-4-141-2018), 2018-06-05
Supplement: Supplementary file 1 [file soil-4-141-2018-supplement.pdf]

Supplement of SOIL, 4, 141–152, 2018  
<https://doi.org/10.5194/soil-4-141-2018-supplement>  
© Author(s) 2018. This work is distributed under  
the Creative Commons Attribution 4.0 License.

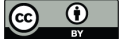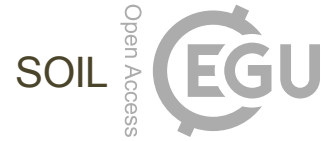

*Supplement of*

## **Separation of soil respiration: a site-specific comparison of partition methods**

**Louis-Pierre Comeau et al.**

*Correspondence to:* Derrick Y. F. Lai (dyflai@cuhk.edu.hk)

The copyright of individual parts of the supplement might differ from the CC BY 4.0 License.

Complementary research data of L.-P. Comeau et al.: Separation of soil respiration

Raw data from Figure 2a. Soil and air temperature and daily rainfall over the study period

| Date   | Air temperature (°C) | Rainfall (mm) |
|--------|----------------------|---------------|
| 01-Feb | 15.202               | 0             |
| 02-Feb | 13.642               | 0             |
| 03-Feb | 13.865               | 0             |
| 04-Feb | 15.089               | 0.4           |
| 05-Feb | 16.312               | 1.6           |
| 06-Feb | 15.678               | 0             |
| 07-Feb | 13.877               | 0             |
| 08-Feb | 14.807               | 0.4           |
| 09-Feb | 9.4433               | 0             |
| 10-Feb | 8.2522               | 0             |
| 11-Feb | 9.4132               | 0             |
| 12-Feb | 10.858               | 0             |
| 13-Feb | 12.174               | 0             |
| 14-Feb | 14.106               | 0             |
| 15-Feb | 14.086               | 0             |
| 16-Feb | 15.418               | 0             |
| 17-Feb | 17.630               | 0             |
| 18-Feb | 17.586               | 0             |
| 19-Feb | 14.767               | 0.2           |
| 20-Feb | 17.750               | 0             |
| 21-Feb | 15.947               | 1.8           |
| 22-Feb | 16.833               | 13.8          |
| 23-Feb | 14.834               | 0             |
| 24-Feb | 7.641                | 0.2           |
| 25-Feb | 7.359                | 2             |
| 26-Feb | 10.010               | 3.2           |
| 27-Feb | 13.326               | 0             |
| 28-Feb | 13.566               | 0             |
| 01-Mar | 15.536               | 0             |
| 02-Mar | 15.440               | 0             |
| 03-Mar | 13.660               | 0             |
| 04-Mar | 16.340               | 0             |
| 05-Mar | 18.264               | 0             |
| 06-Mar | 17.868               | 0             |

|        |        |     |
|--------|--------|-----|
| 07-Mar | 14.564 | 0   |
| 08-Mar | 12.531 | 7.6 |
| 09-Mar | 13.174 | 0.4 |
| 10-Mar | 15.808 | 0   |
| 11-Mar | 15.194 | 0.2 |
| 12-Mar | 16.610 | 0   |
| 13-Mar | 19.758 | 0   |
| 14-Mar | 16.818 | 4   |
| 15-Mar | 13.407 | 0.4 |
| 16-Mar | 14.797 | 0   |
| 17-Mar | 15.519 | 0.2 |

Raw data from Figure 2b. Total soil CO<sub>2</sub> efflux, heterotrophic CO<sub>2</sub> efflux from hand-sorted root exclusion bags and from intact block root exclusion bags.

| Measurement date | Treatment                       | Average CO <sub>2</sub> flux (Mg C ha <sup>-1</sup> y <sup>-1</sup> ) | Sample size (n) | Standard Errors of CO <sub>2</sub> flux (Mg C ha <sup>-1</sup> y <sup>-1</sup> ) |
|------------------|---------------------------------|-----------------------------------------------------------------------|-----------------|----------------------------------------------------------------------------------|
| 03-Feb           | Hand-sorted                     | 6.006                                                                 | 7               | 0.765122                                                                         |
| 11-Feb           | hand-sorted                     | 3.651                                                                 | 7               | 0.598268                                                                         |
| 18-Feb           | hand-sorted                     | 7.604                                                                 | 7               | 1.246508                                                                         |
| 25-Feb           | hand-sorted                     | 4.021                                                                 | 7               | 0.618082                                                                         |
| 03-Mar           | hand-sorted                     | 4.061                                                                 | 7               | 1.06322                                                                          |
| 10-Mar           | hand-sorted                     | 3.515                                                                 | 7               | 0.32851                                                                          |
| 15-Mar           | hand-sorted                     | 3.242                                                                 | 7               | 0.70683                                                                          |
| 31-Mar           | hand-sorted                     | 2.320                                                                 | 7               | 0.73853                                                                          |
| 07-Apr           | hand-sorted                     | 5.118                                                                 | 7               | 0.65287                                                                          |
| 19-Apr           | hand-sorted                     | 8.309                                                                 | 7               | 1.13608                                                                          |
| 03-Feb           | Intact block                    | 2.559                                                                 | 7               | 0.6830                                                                           |
| 11-Feb           | intact block                    | 1.757                                                                 | 7               | 0.55457                                                                          |
| 18-Feb           | intact block                    | 3.719                                                                 | 7               | 0.73140                                                                          |
| 25-Feb           | intact block                    | 1.979                                                                 | 7               | 0.71800                                                                          |
| 03-Mar           | intact block                    | 2.798                                                                 | 7               | 0.98731                                                                          |
| 10-Mar           | intact block                    | 2.354                                                                 | 7               | 1.14021                                                                          |
| 15-Mar           | intact block                    | 2.218                                                                 | 7               | 0.98868                                                                          |
| 31-Mar           | intact block                    | 2.798                                                                 | 7               | 0.5410                                                                           |
| 07-Apr           | intact block                    | 4.334                                                                 | 7               | 0.90804                                                                          |
| 19-Apr           | intact block                    | 5.733                                                                 | 7               | 1.54111                                                                          |
| 03-Feb           | Total soil CO <sub>2</sub> flux | 7.439                                                                 | 7               | 0.65820                                                                          |
| 11-Feb           | Total soil CO <sub>2</sub> flux | 4.095                                                                 | 7               | 0.43979                                                                          |
| 18-Feb           | Total soil CO <sub>2</sub> flux | 8.019                                                                 | 7               | 0.59859                                                                          |
| 25-Feb           | Total soil CO <sub>2</sub> flux | 4.311                                                                 | 7               | 0.51309                                                                          |

|        |                                 |       |   |         |
|--------|---------------------------------|-------|---|---------|
| 03-Mar | Total soil CO <sub>2</sub> flux | 4.504 | 7 | 0.89371 |
| 10-Mar | Total soil CO <sub>2</sub> flux | 5.844 | 7 | 0.78782 |
| 15-Mar | Total soil CO <sub>2</sub> flux | 4.470 | 7 | 0.65258 |
| 31-Mar | Total soil CO <sub>2</sub> flux | 5.37  | 7 | 1.48750 |
| 07-Apr | Total soil CO <sub>2</sub> flux | 8.514 | 7 | 1.0961  |
| 19-Apr | Total soil CO <sub>2</sub> flux | 8.838 | 7 | 0.9710  |

Raw data from Figure 3. Regression between root biomass and CO<sub>2</sub> efflux.

| Average CO <sub>2</sub> flux (Mg C ha <sup>-1</sup> y <sup>-1</sup> ) | Amount of small roots (mg per cm <sup>3</sup> ) |
|-----------------------------------------------------------------------|-------------------------------------------------|
| 12.7                                                                  | 2.83                                            |
| 11.4                                                                  | 3.07                                            |
| 11.1                                                                  | 3.76                                            |
| 10.3                                                                  | 4.83                                            |
| 10.4                                                                  | 2.75                                            |
| 3.6                                                                   | 1.89                                            |
| 6.2                                                                   | 2.53                                            |
| 17.9                                                                  | 4.44                                            |
| 17.3                                                                  | 3.96                                            |
| 17.3                                                                  | 3.61                                            |
| 5.5                                                                   | 2.91                                            |
| 15.0                                                                  | 2.47                                            |
| 3.4                                                                   | 0.48                                            |
| 8.5                                                                   | 1.59                                            |
| 16.6                                                                  | 1.52                                            |
| 10.2                                                                  | 1.95                                            |
| 16.7                                                                  | 1.54                                            |
| 6.1                                                                   | 2.04                                            |
| 8.8                                                                   | 1.34                                            |
| 16.2                                                                  | 3.42                                            |
| 8.4                                                                   | 2.26                                            |
| 10.3                                                                  | 2.14                                            |

Raw data from Figure 4. Lab incubation regression between temperature, moisture and CO<sub>2</sub> efflux

| Volumetric moisture content (%) | temperature (°C) | Average CO <sub>2</sub> flux (g CO <sub>2</sub> m <sup>2</sup> h <sup>-1</sup> ) | Sample size (n) | Standard Error CO <sub>2</sub> flux (g CO <sub>2</sub> m <sup>2</sup> h <sup>-1</sup> ) |
|---------------------------------|------------------|----------------------------------------------------------------------------------|-----------------|-----------------------------------------------------------------------------------------|
| 15                              | 14               | 0.0068                                                                           | 4               | 0.00140                                                                                 |
| 25                              | 14               | 0.0156                                                                           | 4               | 0.00247                                                                                 |
| 35                              | 14               | 0.0210                                                                           | 4               | 0.00500                                                                                 |

|    |    |        |   |         |
|----|----|--------|---|---------|
| 45 | 14 | 0.0184 | 4 | 0.00441 |
| 15 | 20 | 0.0198 | 4 | 0.00243 |
| 25 | 20 | 0.0287 | 4 | 0.00221 |
| 35 | 20 | 0.0325 | 4 | 0.00056 |
| 45 | 20 | 0.0315 | 4 | 0.00254 |
| 15 | 26 | 0.0373 | 4 | 0.00393 |
| 25 | 26 | 0.0647 | 4 | 0.00652 |
| 35 | 26 | 0.0680 | 4 | 0.00420 |
| 45 | 26 | 0.0636 | 4 | 0.00416 |
| 15 | 32 | 0.0677 | 4 | 0.00675 |
| 25 | 32 | 0.1018 | 4 | 0.00702 |
| 35 | 32 | 0.1100 | 4 | 0.00840 |
| 45 | 32 | 0.0957 | 4 | 0.01286 |
